# Supplementary material
Source: Springer Nature journal article supplement (https://www.springerprofessional.de/resource/supplementary/13673_2013_36_MOESM3_ESM.pdf/11899356)
Supplement: MOESM3 [file 11899356]

# SocialSkip System

GAE application logic and  
data -based

YouTube Chrome -less  
player

Custom player buttons  
and user activity logging  
with Java -script
